# Supplementary material
Source: publisher figshare collection journal article supplement (https://sage.figshare.com/ndownloader/files/20804721)
Supplement: Supplementary file 1 [file 20804721]

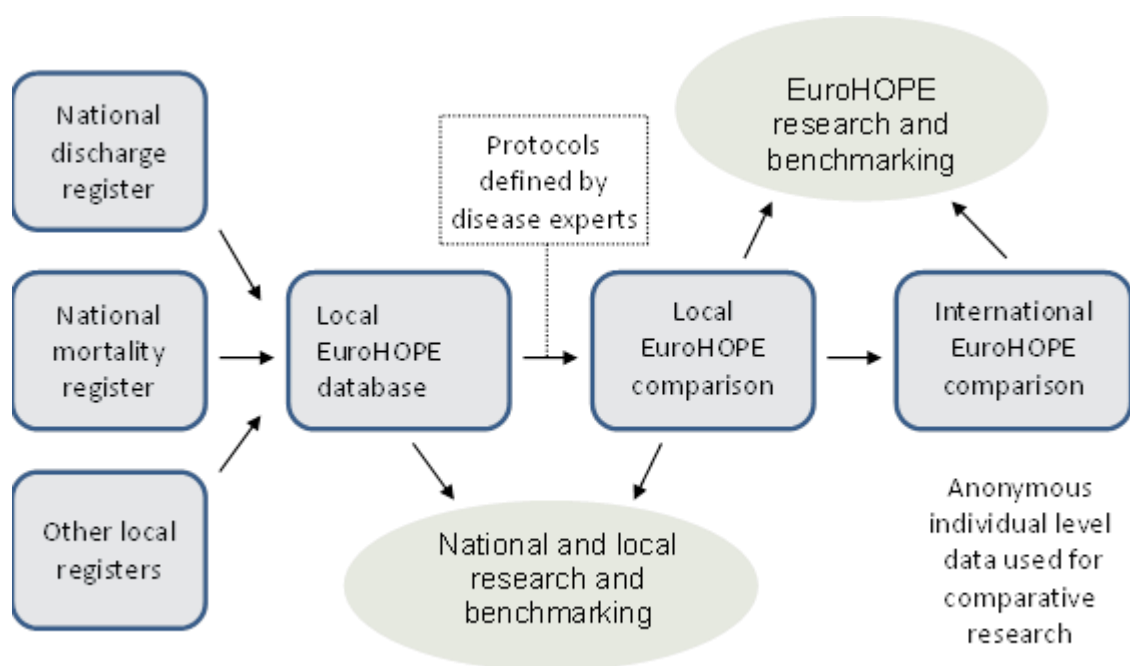

Supplementary Material 1. A depiction of the creation of the data.

Supplementary material 2. Performance indicators and their availability in the capital areas.

| <b>Performance indicator</b>                                           | <b>Data available</b>                                 |
|------------------------------------------------------------------------|-------------------------------------------------------|
| 30-day mortality                                                       | CPH 2014, HEL 2009-2014, OSL 2009-2014, STO 2009-2014 |
| 90-day mortality                                                       | CPH 2014, HEL 2009-2014, OSL 2009-2014, STO 2009-2014 |
| One-year mortality                                                     | CPH 2014, HEL 2009-2014, OSL 2009-2013, STO 2009-2014 |
| Share of patients discharged home (total) within 90 days               | CPH 2014, HEL 2009-2014, OSL 2009-2014                |
| Share of patients discharged home (without help) within 90 days        | CPH 2014, HEL 2009-2014, OSL 2009-2014,               |
| Share of patients institutionalized (90 days)                          | CPH 2014, HEL 2009-2014, OSL 2009-2014                |
| Share of patients institutionalized (one year)                         | CPH 2014, HEL 2009-2014, OSL 2009-2014                |
| Length of first acute hospital admission                               | CPH 2014, HEL 2009-2014, OSL 2009-2014, STO 2009-2014 |
| Length of first acute hospital and inpatient rehabilitation admissions | CPH 2014, HEL 2009-2014, OSL 2009-2014, STO 2009-2014 |
| Length of first institutional episode                                  | CPH 2014, HEL 2009-2014, OSL 2009-2014                |
| Number of all inpatient days (including long-term care), one year      | CPH 2014, HEL 2009-2014, OSL 2009-2013                |
| Number of GP doctor visits (one year)                                  | CPH 2014, HEL 2009-2014, OSL 2009-2013, STO 2009-2014 |
| Number of other doctor visits (one year)                               | CPH 2014, HEL 2009-2014, OSL 2009-2013, STO 2009-2014 |
| All home help visits (one year)                                        | CPH 2014, HEL 2009-2014, OSL 2009-2013                |
| Cost of first acute hospital episode                                   | CPH 2014, HEL 2009-2014, OSL 2009-2014, STO 2009-2014 |
| Cost of first acute hospital and inpatient rehabilitation episode      | CPH 2014, HEL 2009-2014, OSL 2009-2014, STO 2009-2014 |
| Cost of first institutional episode                                    | CPH 2014, HEL 2009-2014, OSL 2009-2014                |
| One year cost                                                          | CPH 2014, HEL 2009-2014, OSL 2009-2013                |

CHP=Copenhagen, HEL=Helsinki, OSL=Oslo, STO=Stockholm

### Supplementary material 3. Risk-adjustment models and their availability

| Model                                                                                                                                                           | Availability                                               |
|-----------------------------------------------------------------------------------------------------------------------------------------------------------------|------------------------------------------------------------|
| M1: age, sex.                                                                                                                                                   | CPH 2014, HEL 2009-2014, OSL 2009-2013/2014, STO 2009-2014 |
| M2: M1 + number of days in different care arrangements within 90 days before index day (acute hospital days, other institutional days, days at home with help). | CPH 2014, HEL 2009-2014, OSL 2009-2013/2014                |
| M3: M1 + comorbidity using data on previous year use of hospital care and prescribed medicine.                                                                  | CPH 2014, HEL 2009-2014, STO July 2011-2014                |
| M4: M1 + additional variables of M2 and M3.                                                                                                                     | CPH 2014, HEL 2009-2014                                    |

CHP=Copenhagen, HEL=Helsinki, OSL=Oslo, STO=Stockholm
